# Supplementary material for: Genome-Wide Identification of the A20/AN1 Zinc Finger Protein Family Genes in Ipomoea batatas and Its Two Relatives and Function Analysis of IbSAP16 in Salinity Tolerance
Source: MDPI journal article supplement (doi:10.3390/ijms231911551), 2022-09-30
Supplement: s1 [file s1]

## Supplementary Figures

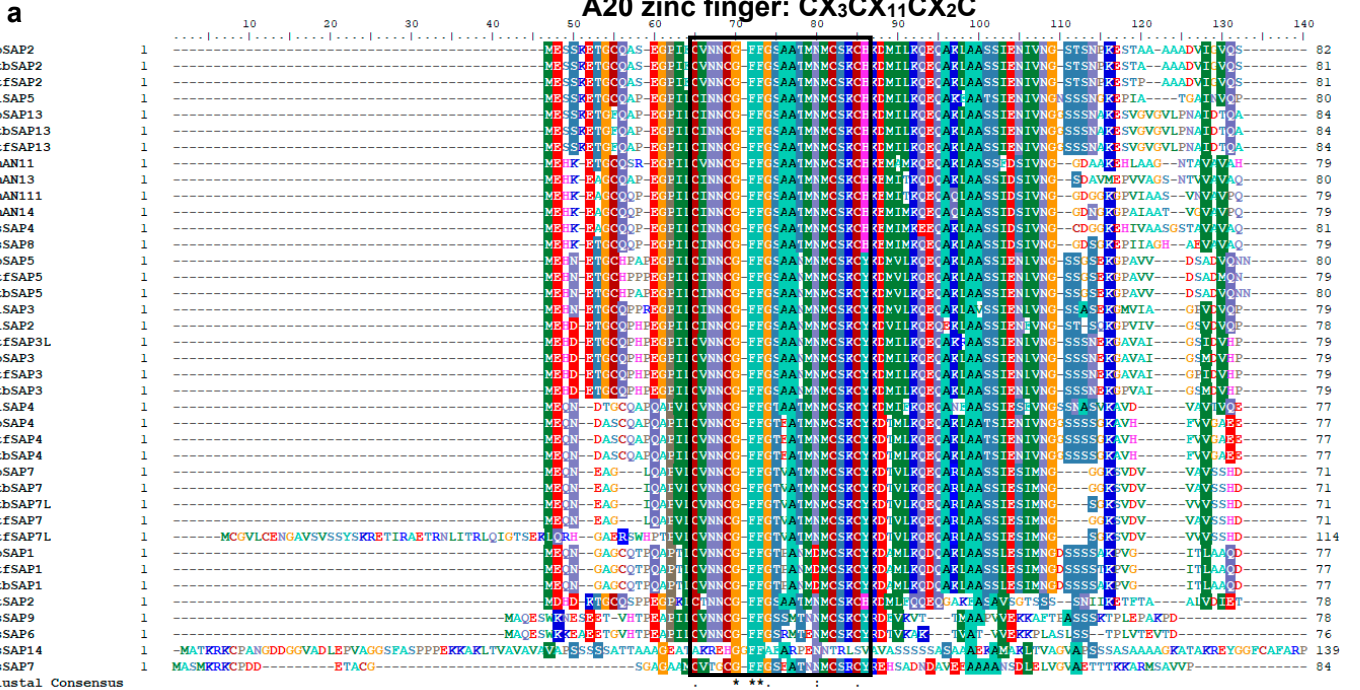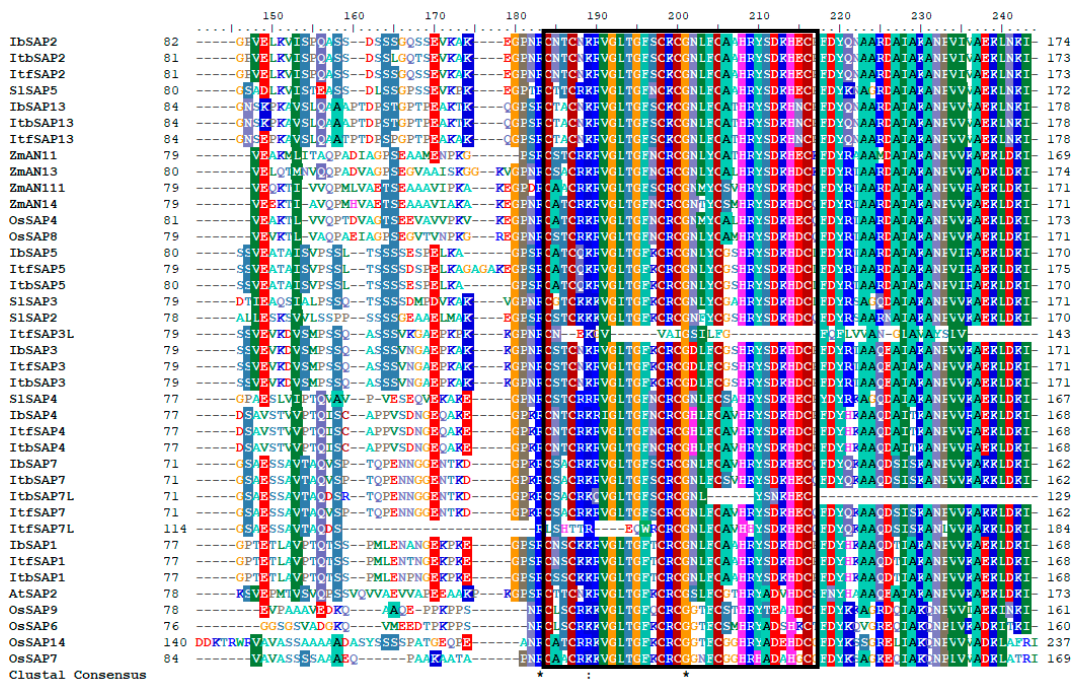

**Type I AN1 zinc finger:  
CX<sub>2</sub>CX<sub>9</sub>CX<sub>1</sub>CX<sub>4</sub>CX<sub>2</sub>HX<sub>5</sub>HXC**

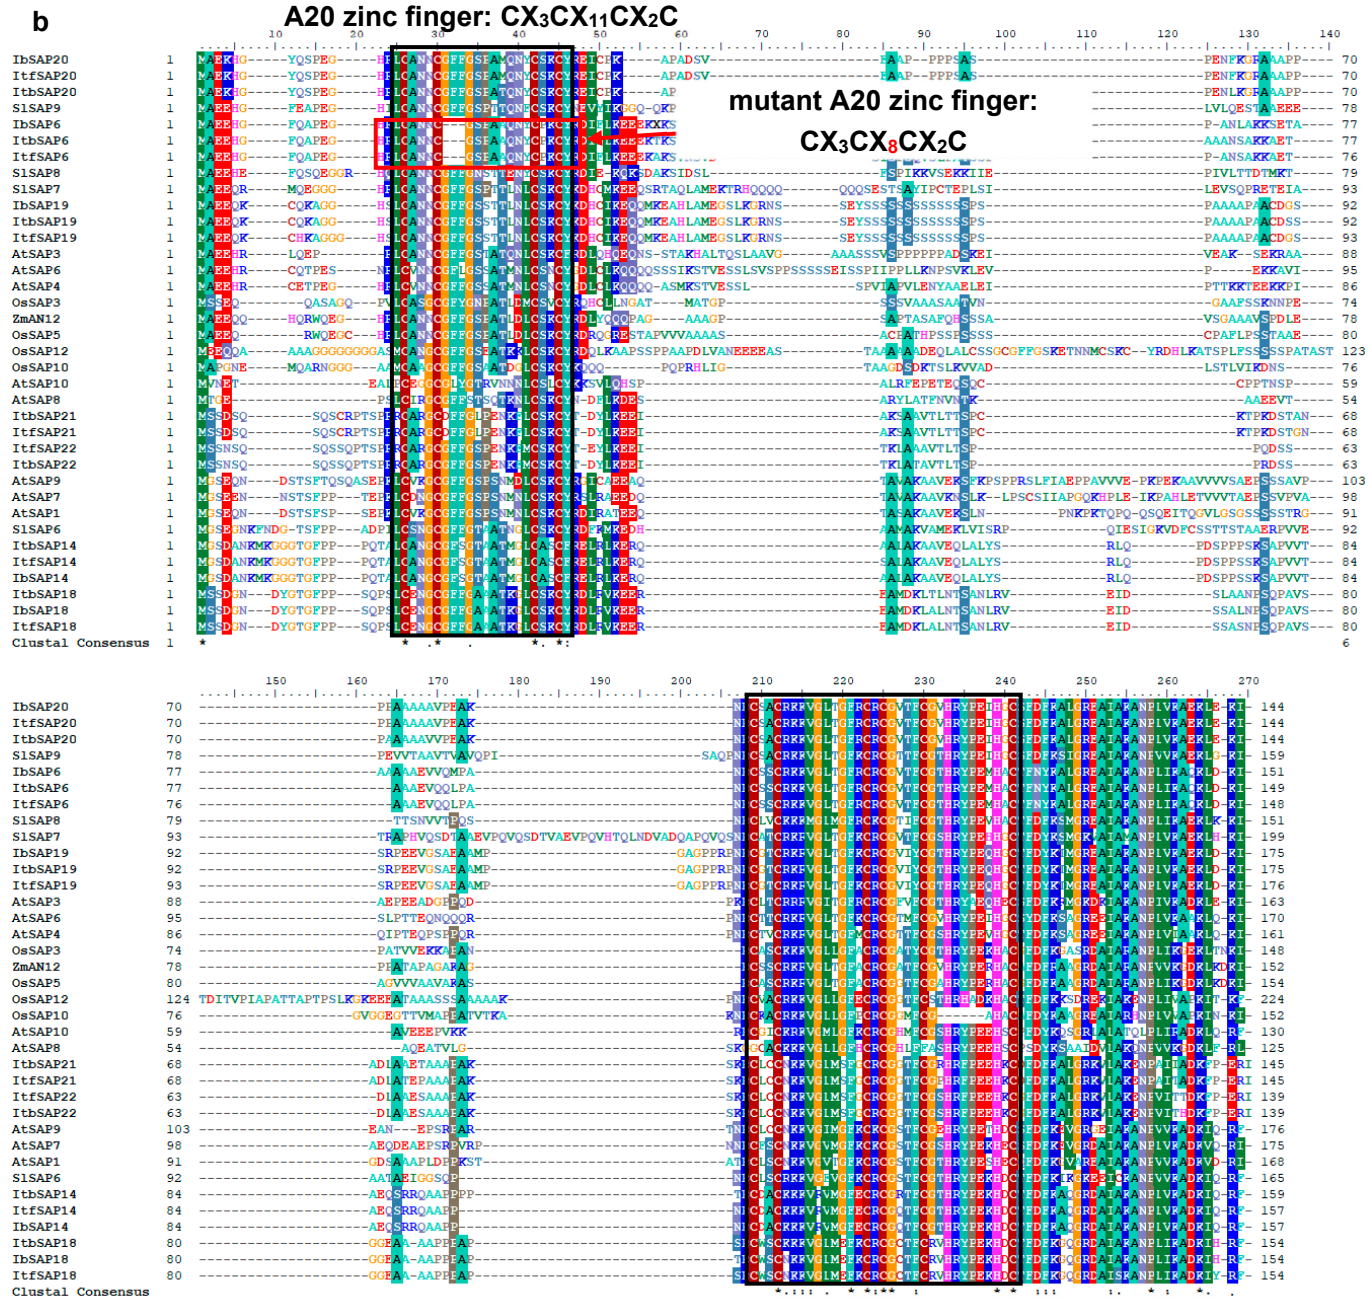

**Type I AN1 zinc finger:**  
**CX<sub>2</sub>CX<sub>9</sub>CX<sub>1</sub>CX<sub>4</sub>CX<sub>2</sub>HX<sub>5</sub>HXC**

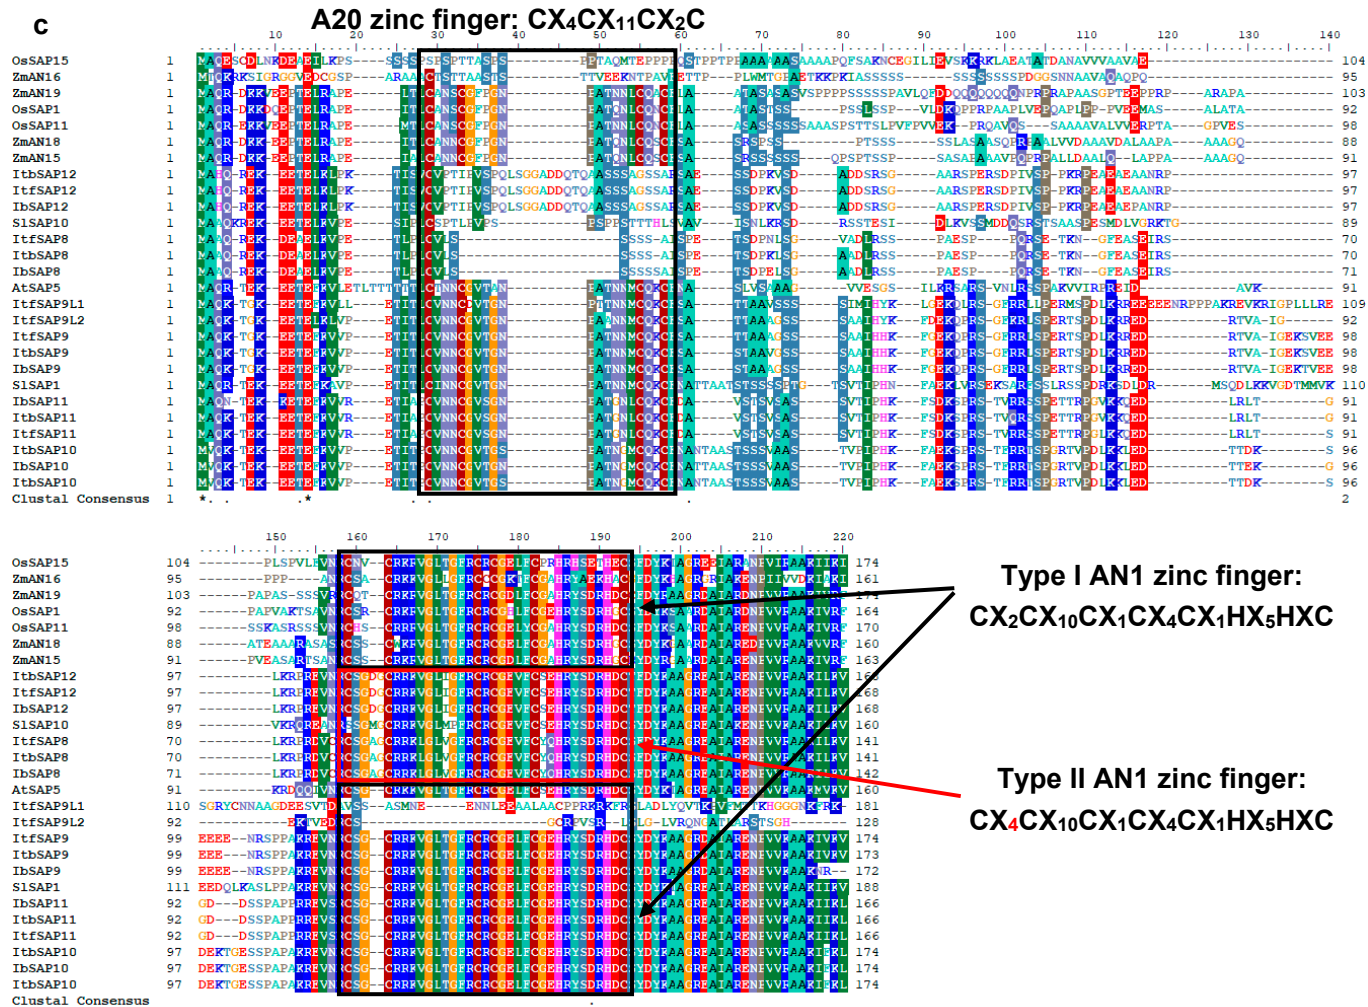



d

### Type II AN1 zinc finger: CX<sub>4</sub>CX<sub>9</sub>CX<sub>1</sub>CX<sub>4</sub>CX<sub>2</sub>HX<sub>5</sub>HXC

|                   |   | 10  | 20  | 30  | 40  | 50  | 60  | 70  | 80  | 90  | 100 |     |
|-------------------|---|-----|-----|-----|-----|-----|-----|-----|-----|-----|-----|-----|
| OsSAP2            | 1 | --- | --- | --- | --- | --- | --- | --- | --- | --- | --- | 48  |
| OsSAP13           | 1 | --- | --- | --- | --- | --- | --- | --- | --- | --- | --- | 100 |
| OsSAP18           | 1 | --- | --- | --- | --- | --- | --- | --- | --- | --- | --- | 95  |
| IbSAP15           | 1 | --- | --- | --- | --- | --- | --- | --- | --- | --- | --- | 95  |
| ItfSAP15          | 1 | --- | --- | --- | --- | --- | --- | --- | --- | --- | --- | 95  |
| IbSAP15           | 1 | --- | --- | --- | --- | --- | --- | --- | --- | --- | --- | 95  |
| SISAP11           | 1 | --- | --- | --- | --- | --- | --- | --- | --- | --- | --- | 94  |
| AtSAP12           | 1 | --- | --- | --- | --- | --- | --- | --- | --- | --- | --- | 95  |
| ZmAN17            | 1 | --- | --- | --- | --- | --- | --- | --- | --- | --- | --- | 94  |
| OsSAP17           | 1 | --- | --- | --- | --- | --- | --- | --- | --- | --- | --- | 96  |
| ZmAN110           | 1 | --- | --- | --- | --- | --- | --- | --- | --- | --- | --- | 89  |
| OsSAP16           | 1 | --- | --- | --- | --- | --- | --- | --- | --- | --- | --- | 89  |
| AtSAP14           | 1 | --- | --- | --- | --- | --- | --- | --- | --- | --- | --- | 65  |
| AtSAP13           | 1 | --- | --- | --- | --- | --- | --- | --- | --- | --- | --- | 89  |
| AtSAP11           | 1 | --- | --- | --- | --- | --- | --- | --- | --- | --- | --- | 89  |
| SISAP13           | 1 | --- | --- | --- | --- | --- | --- | --- | --- | --- | --- | 89  |
| IbSAP16           | 1 | --- | --- | --- | --- | --- | --- | --- | --- | --- | --- | 89  |
| IbSAP16           | 1 | --- | --- | --- | --- | --- | --- | --- | --- | --- | --- | 89  |
| ItfSAP16          | 1 | --- | --- | --- | --- | --- | --- | --- | --- | --- | --- | 89  |
| SISAP12           | 1 | --- | --- | --- | --- | --- | --- | --- | --- | --- | --- | 89  |
| ItfSAP17          | 1 | --- | --- | --- | --- | --- | --- | --- | --- | --- | --- | 89  |
| IbSAP17           | 1 | --- | --- | --- | --- | --- | --- | --- | --- | --- | --- | 89  |
| IbSAP17           | 1 | --- | --- | --- | --- | --- | --- | --- | --- | --- | --- | 89  |
| Clustal Consensus |   |     |     |     |     |     |     |     |     |     |     |     |

|                   |     | 110 | 120 | 130 | 140 | 150 | 160 | 170 | 180 | 190 | 200 |     |
|-------------------|-----|-----|-----|-----|-----|-----|-----|-----|-----|-----|-----|-----|
| OsSAP2            | 49  | --- | --- | --- | --- | --- | --- | --- | --- | --- | --- | 104 |
| OsSAP13           | 101 | --- | --- | --- | --- | --- | --- | --- | --- | --- | --- | 191 |
| OsSAP18           | 96  | --- | --- | --- | --- | --- | --- | --- | --- | --- | --- | 163 |
| IbSAP15           | 96  | --- | --- | --- | --- | --- | --- | --- | --- | --- | --- | 168 |
| ItfSAP15          | 96  | --- | --- | --- | --- | --- | --- | --- | --- | --- | --- | 168 |
| IbSAP15           | 96  | --- | --- | --- | --- | --- | --- | --- | --- | --- | --- | 168 |
| SISAP11           | 96  | --- | --- | --- | --- | --- | --- | --- | --- | --- | --- | 165 |
| AtSAP12           | 96  | --- | --- | --- | --- | --- | --- | --- | --- | --- | --- | 165 |
| ZmAN17            | 96  | --- | --- | --- | --- | --- | --- | --- | --- | --- | --- | 156 |
| OsSAP17           | 97  | --- | --- | --- | --- | --- | --- | --- | --- | --- | --- | 164 |
| ZmAN110           | 90  | --- | --- | --- | --- | --- | --- | --- | --- | --- | --- | 167 |
| OsSAP16           | 90  | --- | --- | --- | --- | --- | --- | --- | --- | --- | --- | 168 |
| AtSAP14           | 66  | --- | --- | --- | --- | --- | --- | --- | --- | --- | --- | 109 |
| AtSAP13           | 90  | --- | --- | --- | --- | --- | --- | --- | --- | --- | --- | 163 |
| AtSAP11           | 90  | --- | --- | --- | --- | --- | --- | --- | --- | --- | --- | 172 |
| SISAP13           | 90  | --- | --- | --- | --- | --- | --- | --- | --- | --- | --- | 164 |
| IbSAP16           | 90  | --- | --- | --- | --- | --- | --- | --- | --- | --- | --- | 164 |
| IbSAP16           | 90  | --- | --- | --- | --- | --- | --- | --- | --- | --- | --- | 164 |
| ItfSAP16          | 90  | --- | --- | --- | --- | --- | --- | --- | --- | --- | --- | 164 |
| SISAP12           | 90  | --- | --- | --- | --- | --- | --- | --- | --- | --- | --- | 165 |
| ItfSAP17          | 90  | --- | --- | --- | --- | --- | --- | --- | --- | --- | --- | 165 |
| IbSAP17           | 90  | --- | --- | --- | --- | --- | --- | --- | --- | --- | --- | 165 |
| IbSAP17           | 90  | --- | --- | --- | --- | --- | --- | --- | --- | --- | --- | 165 |
| Clustal Consensus |     |     |     |     |     |     |     |     |     |     |     |     |

### Type II AN1 zinc finger: CX<sub>4</sub>CX<sub>11</sub>CX<sub>1</sub>CX<sub>4</sub>CX<sub>2</sub>HX<sub>5</sub>HXC

|                   |     | 210 | 220 | 230 | 240 | 250 | 260 | 270 | 280 | 290 | 300 |     |
|-------------------|-----|-----|-----|-----|-----|-----|-----|-----|-----|-----|-----|-----|
| OsSAP2            | 104 | --- | --- | --- | --- | --- | --- | --- | --- | --- | --- | 124 |
| OsSAP13           | 191 | --- | --- | --- | --- | --- | --- | --- | --- | --- | --- | 211 |
| OsSAP18           | 163 | --- | --- | --- | --- | --- | --- | --- | --- | --- | --- | 183 |
| IbSAP15           | 168 | --- | --- | --- | --- | --- | --- | --- | --- | --- | --- | 182 |
| ItfSAP15          | 168 | --- | --- | --- | --- | --- | --- | --- | --- | --- | --- | 182 |
| IbSAP15           | 168 | --- | --- | --- | --- | --- | --- | --- | --- | --- | --- | 182 |
| SISAP11           | 165 | --- | --- | --- | --- | --- | --- | --- | --- | --- | --- | 179 |
| AtSAP12           | 165 | --- | --- | --- | --- | --- | --- | --- | --- | --- | --- | 176 |
| ZmAN17            | 156 | --- | --- | --- | --- | --- | --- | --- | --- | --- | --- | 170 |
| OsSAP17           | 164 | --- | --- | --- | --- | --- | --- | --- | --- | --- | --- | 178 |
| ZmAN110           | 168 | --- | --- | --- | --- | --- | --- | --- | --- | --- | --- | 258 |
| OsSAP16           | 169 | --- | --- | --- | --- | --- | --- | --- | --- | --- | --- | 258 |
| AtSAP14           | 110 | --- | --- | --- | --- | --- | --- | --- | --- | --- | --- | 169 |
| AtSAP13           | 164 | --- | --- | --- | --- | --- | --- | --- | --- | --- | --- | 217 |
| AtSAP11           | 173 | --- | --- | --- | --- | --- | --- | --- | --- | --- | --- | 247 |
| SISAP13           | 165 | --- | --- | --- | --- | --- | --- | --- | --- | --- | --- | 246 |
| IbSAP16           | 165 | --- | --- | --- | --- | --- | --- | --- | --- | --- | --- | 245 |
| IbSAP16           | 165 | --- | --- | --- | --- | --- | --- | --- | --- | --- | --- | 245 |
| ItfSAP16          | 165 | --- | --- | --- | --- | --- | --- | --- | --- | --- | --- | 245 |
| SISAP12           | 166 | --- | --- | --- | --- | --- | --- | --- | --- | --- | --- | 245 |
| ItfSAP17          | 166 | --- | --- | --- | --- | --- | --- | --- | --- | --- | --- | 262 |
| IbSAP17           | 166 | --- | --- | --- | --- | --- | --- | --- | --- | --- | --- | 262 |
| IbSAP17           | 166 | --- | --- | --- | --- | --- | --- | --- | --- | --- | --- | 262 |
| Clustal Consensus |     |     |     |     |     |     |     |     |     |     |     |     |

### C<sub>2</sub>H<sub>2</sub> zinc finger

|                   |     | 310 | 320 | 330 |     |
|-------------------|-----|-----|-----|-----|-----|
| OsSAP2            | 125 | --- | --- | --- | 148 |
| OsSAP13           | 212 | --- | --- | --- | 236 |
| OsSAP18           | 184 | --- | --- | --- | 201 |
| IbSAP15           | 182 | --- | --- | --- | 192 |
| ItfSAP15          | 182 | --- | --- | --- | 192 |
| IbSAP15           | 182 | --- | --- | --- | 192 |
| SISAP11           | 179 | --- | --- | --- | 188 |
| AtSAP12           | 176 | --- | --- | --- | 186 |
| ZmAN17            | 170 | --- | --- | --- | 180 |
| OsSAP17           | 178 | --- | --- | --- | 188 |
| ZmAN110           | 259 | --- | --- | --- | 290 |
| OsSAP16           | 259 | --- | --- | --- | 290 |
| AtSAP14           | 170 | --- | --- | --- | 191 |
| AtSAP13           | 218 | --- | --- | --- | 249 |
| AtSAP11           | 248 | --- | --- | --- | 279 |
| SISAP13           | 247 | --- | --- | --- | 277 |
| IbSAP16           | 246 | --- | --- | --- | 277 |
| IbSAP16           | 246 | --- | --- | --- | 277 |
| ItfSAP16          | 246 | --- | --- | --- | 277 |
| SISAP12           | 241 | --- | --- | --- | 272 |
| ItfSAP17          | 263 | --- | --- | --- | 294 |
| IbSAP17           | 263 | --- | --- | --- | 294 |
| IbSAP17           | 263 | --- | --- | --- | 294 |
| Clustal Consensus |     |     |     |     |     |

### C<sub>2</sub>H<sub>2</sub> zinc finger

**Figure S1.** Alignment of amino acid sequences of clade I **(a)**, II **(b)**, III **(c)**, and IV **(d)** SAPs mentioned in this study. Amino acid sequences of SAPs were aligned and shown with ClustalW method in BioEdit program. A20 zinc fingers, type I AN1 zinc fingers, type II AN1 zinc fingers, and C<sub>2</sub>H<sub>2</sub> zinc fingers were indicated with frames, respectively. “\*” indicates positions which have a single, fully conserved residue. “:” indicates that one of the following ‘strong’ groups is fully conserved. “.” indicates that one of the following ‘weaker’ groups is fully conserved.

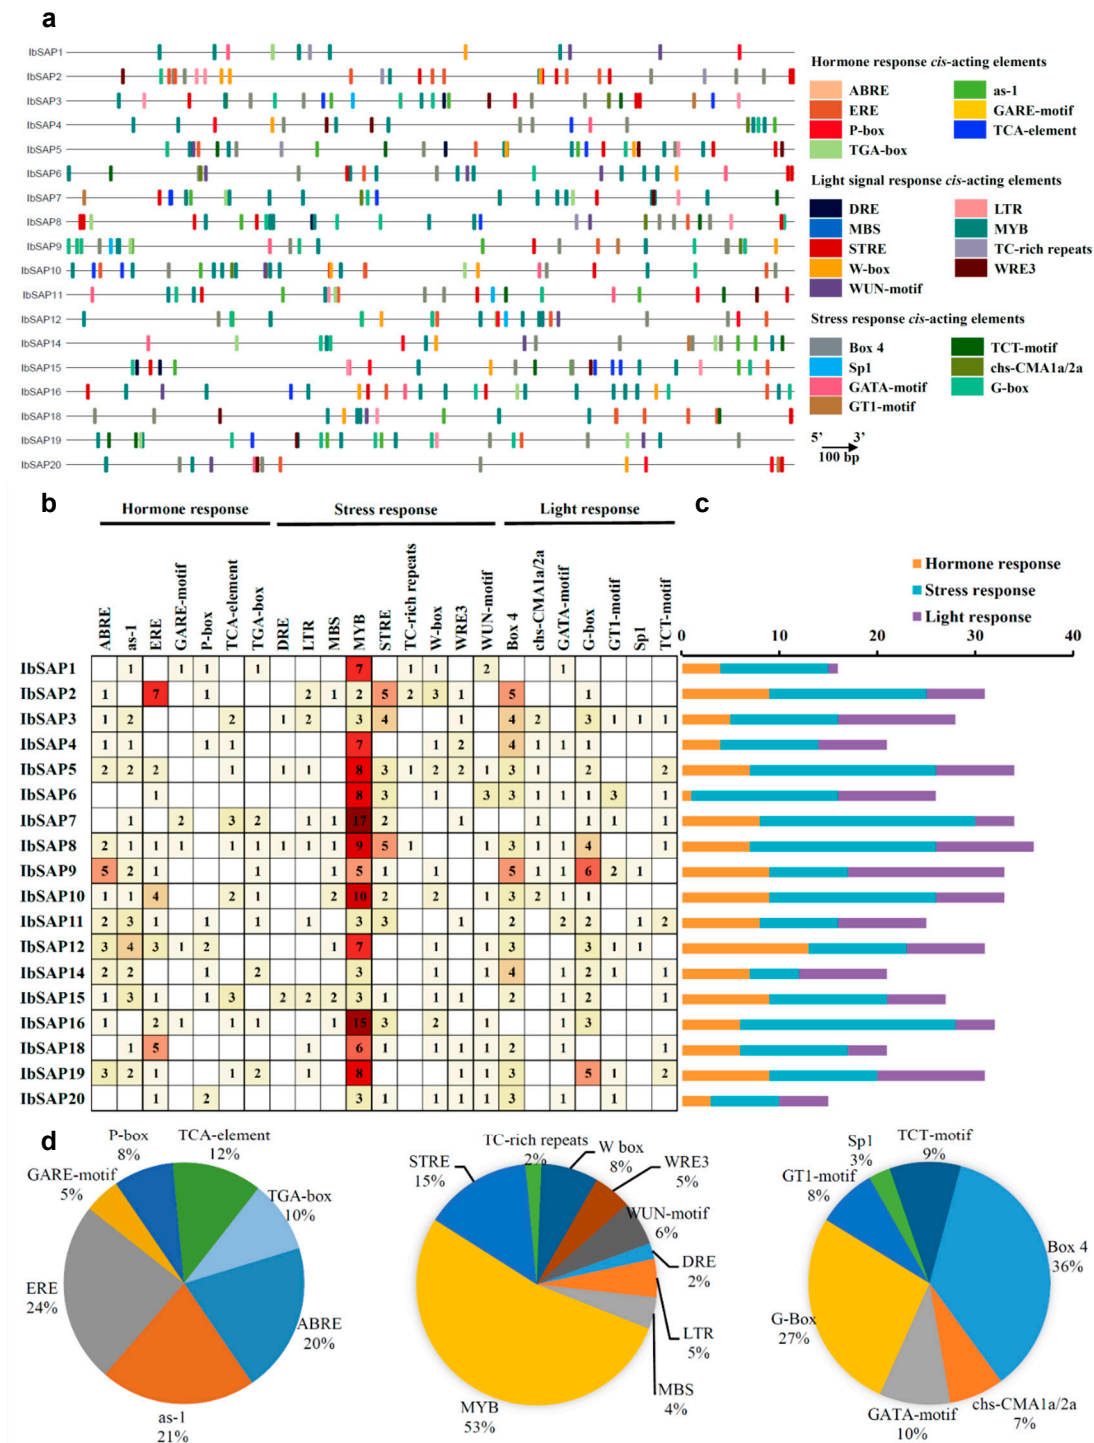

**Figure S2.** *Cis*-acting elements prediction in *IbSAP* promoters. 2,000 bp upstream sequences of *IbSAPs* were sent to PlantCARE for *cis*-acting element analysis. **a**, distribution of *cis*-element in *IbSAP* promoters. **b**, numbers indicate the number of each *cis*-acting element in the promoter of each *IbSAP* gene. **c**, numbers of hormone, light, and stress response *cis*-acting elements in the promoter of each *IbSAP* gene are shown. **d**, the percentage of different *cis*-acting elements in each element class.

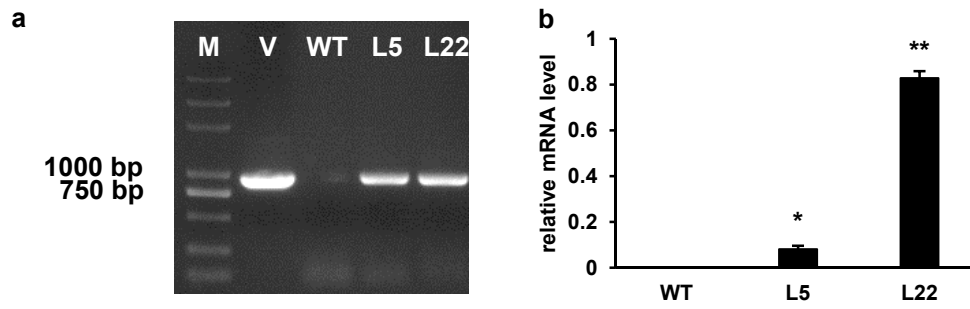

**Figure S3.** Identification of *IbSAP16*-transgenic *Arabidopsis*. **a**, genome PCR identification of *IbSAP16*-transgenic *Arabidopsis* lines. M, marker; V, pGWB12-*IbSAP16* vector control; WT, wild type *Arabidopsis*; L5 and L22, *IbSAP16*-transgenic *Arabidopsis* line 5 and 22. **b**, relative expression level of *IbSAP16* in WT and transgenic lines by RT-qPCR. The *Arabidopsis Actin2* gene was used as an internal reference. Data are presented as means  $\pm$  standard error (n = 3). "\*" or "\*\*" indicate a significant difference from that of WT at  $p < 0.05$  or 0.01, by Student's *t*-test.
