# Supplementary material for: Genome-Wide Identification of the A20/AN1 Zinc Finger Protein Family Genes in Ipomoea batatas and Its Two Relatives and Function Analysis of IbSAP16 in Salinity Tolerance
Source: Int J Mol Sci. 2022 Sep 30;23(19):11551. doi: 10.3390/ijms231911551 (PMC9570247; doi:10.3390/ijms231911551)
Supplement: Supplementary file 1 [file ijms-23-11551-s001.zip › Supplementary Tables 20220918.xlsx]

## Sheet: Table S1
Table S1 Locus or accession number of SAPs used in this study
Species	Gene ID	Locus	Accession number
Arabidopsis thaliana	AtSAP1	AT1G12440
	AtSAP2	AT1G51200
	AtSAP3	AT2G27580
	AtSAP4	AT2G36320
	AtSAP5	AT3G12630
	AtSAP6	AT3G52800
	AtSAP7	AT4G12040
	AtSAP8	AT4G14225
	AtSAP9	AT4G22820
	AtSAP10	AT4G25380
	AtSAP11	AT2G41835
	AtSAP12	AT3G28210
	AtSAP13	AT3G57480
	AtSAP14	AT5G48205
Oryza sativa	OsSAP1	LOC_Os09g31200.1	AK106128
	OsSAP2	LOC_Os01g52030.1	AK111476
	OsSAP3	LOC_Os01g56040.1
	OsSAP4	LOC_Os02g10200.1	AK067403
	OsSAP5	LOC_Os02g32840.1	AK063708
	OsSAP6	LOC_Os03g57890.1	AK102503
	OsSAP7	LOC_Os03g57900.1	AK108205
	OsSAP8	LOC_Os06g41010.1	AK069720
	OsSAP9	LOC_Os07g07350.1	AK121813
	OsSAP10	LOC_Os07g07400.1
	OsSAP11	LOC_Os08g39450.1	AK101969
	OsSAP12	LOC_Os08g33880.1
	OsSAP13	LOC_Os01g51990.1
	OsSAP14	LOC_Os03g57920.1	AK108384
	OsSAP15	LOC_Os05g23470.1	AK072411
	OsSAP16	LOC_Os07g38240.1
	OsSAP17	LOC_Os09g21710.1
	OsSAP18	LOC_Os07g07370.1
Zea mays	ZmAN11		DQ244747
	ZmAN12	ZmGSStuc11l-12-04.59743.1	EF396224
	ZmAN13	ZmGSStuc11-12-04.10004.1	EF396225
	ZmAN14	ZmGSStuc11-12-04.57324.2	EF396226
	ZmAN15	ZmGSStuc11-12-04.90226.1	EF396227
	ZmAN16	ZmGSStuc11-12-04.7428.1
	ZmAN17	ZmGSStuc11-12-04.35068.1	EF396228
	ZmAN18	ZmGSStuc11-12-04.19079.1	EF396229
	ZmAN19	ZmGSStuc11-12-04.41832.1	EF396230
	ZmAN110	ZmGSStuc11-12-04.15687.1	EF396223
	ZmAN111	ZmGSStuc11-12-04.16050.1
Solanum lycopersicum	SlSAP1		DQ395293
	SlSAP2		FJ442188
	SlSAP3		FJ442189
	SlSAP4		FJ442190
	SlSAP5		FJ442191
	SlSAP6		FJ442192
	SlSAP7		FJ442193
	SlSAP8		FJ442194
	SlSAP9		FJ442195
	SlSAP10		FJ442196
	SlSAP11		FJ442197
	SlSAP12		FJ442198
	SlSAP13		FJ442199
Ipomoea triloba	ItbSAP1	itb11g02180
	ItbSAP2	itb01g23460
	ItbSAP3	itb14g12520
	ItbSAP4	itb09g17680
	ItbSAP5	itb07g02160
	ItbSAP6	itb09g14640
	ItbSAP7L	itb13g22620
	ItbSAP7_C1	itb04g04740
	ItbSAP7_C2	itb05g04150
	ItbSAP8	itb07g02150
	ItbSAP9	itb11g02160
	ItbSAP10	itb04g04730
	ItbSAP11	itb09g17700
	ItbSAP12	itb04g33640
	ItbSAP13	itb15g03400
	ItbSAP14	itb08g00640
	ItbSAP15	itb03g00960
	ItbSAP16	itb01g23740
	ItbSAP17	itb15g03680
	ItbSAP18_C1	itb12g14710
	ItbSAP18_C2	itb13g06050
	ItbSAP19	itb03g17820
	ItbSAP20	itb15g01370
	ItbSAP21	itb10g00930
	ItbSAP22_C1	itb10g00940
	ItbSAP22_C2	itb10g00950
Ipomoea trifida	ItfSAP1	itf11g02220
	ItfSAP2	itf01g23650
	ItfSAP3	itf14g08540
	ItfSAP3L	itf08g17580
	ItfSAP4	itf09g16750
	ItfSAP5	itf07g02040
	ItfSAP6	itf09g13670
	ItfSAP7	itf04g04580
	ItfSAP7L_C1	itf04g25770
	ItfSAP7L_C2	itf06g08290
	ItfSAP8	itf07g02030
	ItfSAP9	itf11g02210
	ItfSAP9L1	itf06g06640
	ItfSAP9L2	itf09g07500
	ItfSAP10	itf04g04570
	ItfSAP11	itf09g16860
	ItfSAP12	itf04g33920
	ItfSAP13	itf15g03140
	ItfSAP14	itf08g00670
	ItfSAP15	itf03g01000
	ItfSAP16	itf01g23880
	ItfSAP17	itf15g03390
	ItfSAP18_C1	itf12g15850
	ItfSAP18_C2	itf13g04260
	ItfSAP19	itf03g17050
	ItfSAP20	itf15g01260
	ItfSAP21	itf10g01070
	ItfSAP22_C1	itf10g01080
	ItfSAP22_C2	itf10g01090

## Sheet: Table S2
Table S2 Alignments of IbSAPs with ItbSAPs and ItfSAPs
SAPs in Sweetpotato	length	Homologs in wild relatives	Length	Expect	Coverage	Identities	Positives	Gaps
IbSAP1	168	ItbSAP1	168	1e-128	1	0.9881	0.9881	0
		ItfSAP1	168	1e-128	1	0.9881	0.9881	0
IbSAP2	174	ItbSAP2	173	1e-128	0.994253	0.982759	0.988506	0.00574713
		ItfSAP2	173	5e-129	0.994253	0.988506	0.988506	0.00574713
IbSAP3	171	ItbSAP3	171	1e-130	1	0.994152	0.994152	0
		ItfSAP3	171	6e-130	1	0.988304	0.994152	0
IbSAP4	168	ItbSAP4	168	2e-130	1	0.994048	1	0
		ItfSAP4	168	2e-130	1	0.994048	1	0
IbSAP5	170	ItbSAP5	170	7e-131	1	1	1	0
		ItfSAP5	175	1e-123	0.994318	0.943182	0.954545	0.0397727
IbSAP6	151	ItbSAP6	149	4e-99	0.986755	0.907285	0.927152	0.013245
		ItfSAP6	148	2e-100	0.980132	0.913907	0.933775	0.0198675
IbSAP7	162	ItbSAP7	162	7e-124	1	0.987654	1	0
		ItfSAP7	162	9e-125	1	1	1	0
IbSAP8	142	ItbSAP8	141	7e-103	0.992958	0.985915	0.992958	0.00704225
		ItfSAP8	141	3e-102	0.992958	0.978873	0.978873	0.00704225
IbSAP9	172	ItbSAP9	173	4e-126	1	0.982353	0.988235	0.00588235
		ItfSAP9	174	1e-128	1	0.988235	1	0
IbSAP10	174	ItbSAP10	174	7e-130	1	0.977011	0.988506	0
		ItfSAP10	174	2e-132	1	1	1	0
IbSAP11	166	ItbSAP11	166	3e-124	1	0.981928	0.993976	0
		ItfSAP11	166	2e-123	1	0.975904	0.987952	0
IbSAP12	168	ItbSAP12	168	6e-124	1	0.994048	0.994048	0
		ItfSAP12	168	6e-124	1	0.994048	0.994048	0
IbSAP13	178	ItbSAP13	178	3e-136	1	1	1	0
		ItfSAP13	178	4e-133	1	0.977528	0.983146	0
IbSAP14	157	ItbSAP14	159	8e-115	1	0.968553	0.974843	0.0125786
		ItfSAP14	157	4e-119	1	0.993631	1	0
IbSAP15	192	ItbSAP15	192	1e-136	1	0.9375	0.958333	0
		ItfSAP15	192	1e-139	1	0.958333	0.96875	0
IbSAP16	277	ItbSAP16	277	0	1	0.98917	0.99278	0
		ItfSAP16	277	0	1	0.98556	0.99278	0
IbSAP17	294	ItbSAP17	294	0	1	0.972789	0.982993	0
		ItfSAP17	294	0	1	0.982993	0.986395	0
IbSAP18	154	ItbSAP18	154	3e-115	1	0.967532	0.974026	0
		ItfSAP18	154	2e-116	1	0.974026	0.993506	0
IbSAP19	175	ItbSAP19	175	4e-132	1	0.994286	0.994286	0
		ItfSAP19	176	3e-130	1	0.988636	0.988636	0.00568182
IbSAP20	144	ItbSAP20	144	3e-104	1	0.972222	0.972222	0
		ItfSAP20	144	3e-107	1	1	1	0

## Sheet: Table S3
Table S3 Primers used in this study
Gene ID	Primer Name	Primer Sequence (5'-3')
IbSAP1	qIbSAP1-F	CGTAGGCATCACCCTAGCTG
	qIbSAP1-R	GCATCTGCTTGGACCTTCCT
IbSAP2	qIbSAP2-F	TCATCGGGTCAGAGCTCAGA
	qIbSAP2-R	AGAGATTCCCGCACTTGCAA
IbSAP3	qIbSAP3-F	ATGCCAACCCCATCCTGAAG
	qIbSAP3-R	TGATGCAGCAAGCTTAGCCT
IbSAP4	qIbSAP4-F	AAGACTCTGCTGTGTCCACG
	qIbSAP4-R	TCACCATTGTCACTCACGGG
IbSAP5	qIbSAP5-F	CTGTGCCACTTGCCAGAAAC
	qIbSAP5-R	ATCAGAGTAGCGATGCGAGC
IbSAP6	qIbSAP6-F	TGTTCGAGTTGCCGGAAGAA
	qIbSAP6-R	TGGCTATGGCTTCTCTCCCT
IbSAP7	qIbSAP7-F	TTCTGCAGAGTCCAGTGCAG
	qIbSAP7-R	ACCGTCCTTCGTGTTCTCAC
IbSAP8	qIbSAP8-F	TTCTTCCGCCATATCACCGG
	qIbSAP8-R	AGCCGTTTTTCGTCTCCGAT
IbSAP9	qIbSAP9-F	CGGCGAGAAACAGCCTAGAT
	qIbSAP9-R	ACCGATTCTCCTCCTCCTCC
IbSAP10	qIbSAP10-F	GCCGAGAAGTCGCCTAGATC
	qIbSAP10-R	CCGTCGTATCCTCCAGCTTC
IbSAP11	qIbSAP11-F	ACGGAGAAAGAGGAGACGGA
	qIbSAP11-R	CGTCGAAGCATTTCTGGCAG
IbSAP12	qIbSAP12-F	GAGGTGTTCTGTTCCGAGCA
	qIbSAP12-R	ACCGGATTTTCCCTCGCAAT
IbSAP13	qIbSAP13-F	GGTGTCGGTGTGCTTCCTAA
	qIbSAP13-R	CCTTGTTTGGCCTTCGCTTC
IbSAP14	qIbSAP14-F	TGTGGGGTCCATAGGTACCC
	qIbSAP14-R	CTACGGCGTCTCTTCCTTGG
IbSAP15	qIbSAP15-F	TTCTCCCCTTCCAATGCGAC
	qIbSAP15-R	GGGCAGGCGTGGGATTTATA
IbSAP15	IbSAP15-F	ATGGGAGGAGGAACAGAAGC
	IbSAP15-R	TCAAAAAGCTTTAACAGAAGGTATGGT
IbSAP16	qIbSAP16-F	GCACCATCCTCCTCGAGATG
	qIbSAP16-R	TTGTTTACGCTGCTTTGGCC
	IbSAP16-F	ATGGGGACACCGGCATTTCC
	IbSAP16-R	ACTAGGCTTTTGAAGTACCTCCATGG
IbSAP17	qIbSAP17-F	CAAACCTGGGAAAGCACTGC
	qIbSAP17-R	TTCTGACAGCAATCGCAGGT
IbSAP18	qIbSAP18-F	CCGAGTAGGTGCTGGAGTTG
	qIbSAP18-R	ATTAGCCTTGGCGATGGCAT
IbSAP19	qIbSAP19-F	CAAGACCATGGGGAGGGAAG
	qIbSAP19-R	GCCAGCTACGATGACCCTAC
IbSAP20	qIbSAP20-F	TCCCCAGCTTTCTTTTCCCC
	qIbSAP20-R	CCGGTAGCATTTGGAGCAGT
IbARF	qIbARF-F	CTTTGCCAAGAAGGAGATGC
	qIbARF-R	TCTTGTCCTGACCACCAACA
AtActin	qAtActin-F	GCACCCTGTTCTTCTTACCGA
	qAtActin-R	AGTAAGGTCACGTCCAGCAAGG
